# Supplementary material for: School-based intervention for the prevention of HPV among adolescents: a cluster randomised controlled study
Source: HighWire-hosted journal article supplement (doi:10.1136/bmjopen-2015-009875), 2016-01-01
Supplement: bmjopen-2015-009875supp.pdf [file bmjopen-2015-009875supp.pdf]

## **Appendix - Questions used for primary outcome**

Six point Likert scale: Totally agree to totally disagree and Do not know (Do not know grouped together with neither agree nor disagree in the analysis)

### *HBM Benefits*

The HPV vaccine is effective in preventing condyloma

The HPV vaccine is effective in preventing cervical cancer

I will vaccinate against HPV

### *HBM Barriers*

The HPV vaccine can cause adverse effects

It is problematic to book an appointment for HPV vaccination

I am afraid of needles

### *HBM Severity*

The HPV infection is a serious health concern

Cervical cancer is a serious disease

### *HBM Susceptibility*

Young women are at risk of contracting HPV

Young men are at risk of contracting HPV

### *Condom use*

I intend to use condom if I have sex with a new partner
